# Supplementary material for: Ignoring Imperfect Detection in Biological Surveys Is Dangerous: A Response to ‘Fitting and Interpreting Occupancy Models'
Source: PubMed Central journal article supplement (PMC4116132; doi:10.1371/journal.pone.0099571), 2014-07-30
Supplement: pone.0099571.s001.pdf [file pone.0099571.s001.pdf]

## Appendix S1: Full simulation results (scenarios A-B)

This appendix contains the full simulations results for the simulated scenarios (table S1.1). For all scenarios we tested all the combinations of the following sampling sizes:  $S = 55, 110$  or  $165$  sites and  $K = 2, 3, 4$  or  $5$  replicate surveys per site

Table S1.1 Simulated scenarios

|              | Occupancy probability | Detection probability                                                                                                                                          |
|--------------|-----------------------|----------------------------------------------------------------------------------------------------------------------------------------------------------------|
| Scenario A1* | $\psi = 0.4$          | $\text{logit}(p_i) = -0.533 + 0.22x_i$                                                                                                                         |
| Scenario A2  | $\psi = 0.8$          | $\text{logit}(p_i) = -2.0 + 0.20x_i$                                                                                                                           |
| Scenario B1* | $\psi = 0.4$          | $p_i \sim \text{Beta}(0.5,1)$ for $x_i \in \{1, 2\}$ ,<br>$p_i \sim \text{Beta}(1,1)$ for $x_i = 3$ ,<br>$p_i \sim \text{Beta}(10,2)$ for $x_i \in \{4, 5\}$ . |
| Scenario B2  | $\psi = 0.4$          | $p_i \sim \text{Beta}(3,6)$ for $x_i \in \{1, 2\}$ ,<br>$p_i \sim \text{Beta}(5,5)$ for $x_i = 3$ ,<br>$p_i \sim \text{Beta}(10,2)$ for $x_i \in \{4, 5\}$ .   |
| Scenario B3  | $\psi = 0.8$          | $p_i \sim \text{Beta}(3,6)$ for $x_i \in \{1, 2\}$ ,<br>$p_i \sim \text{Beta}(5,5)$ for $x_i = 3$ ,<br>$p_i \sim \text{Beta}(10,2)$ for $x_i \in \{4, 5\}$ .   |

\* Scenario explored by WLD.

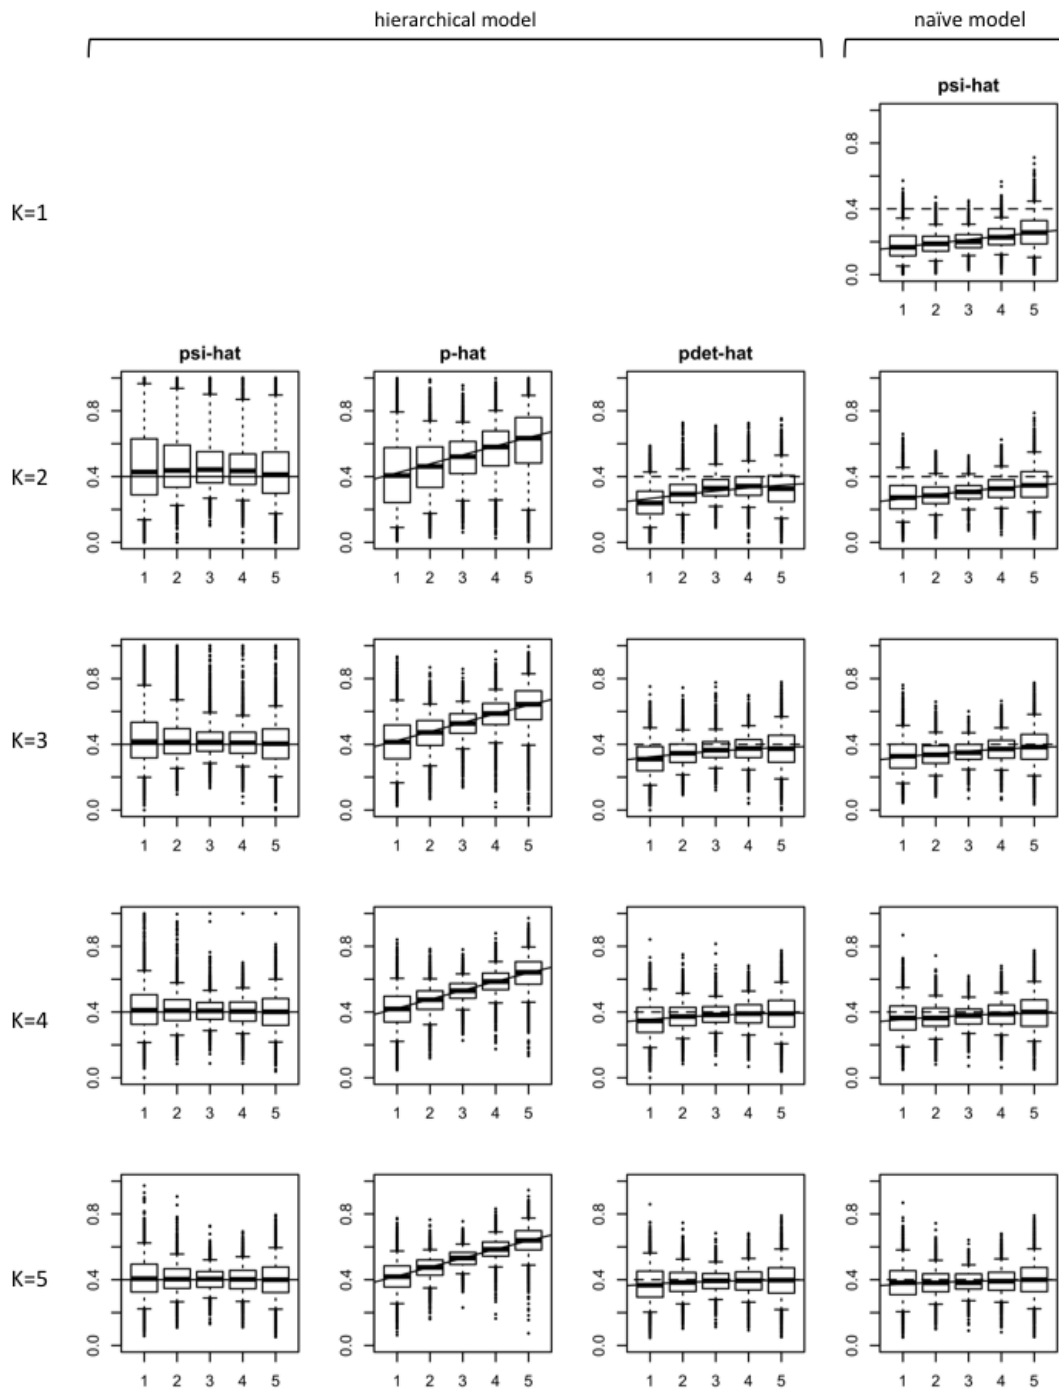

Figure S1.1: Scenario A1,  $S = 55$

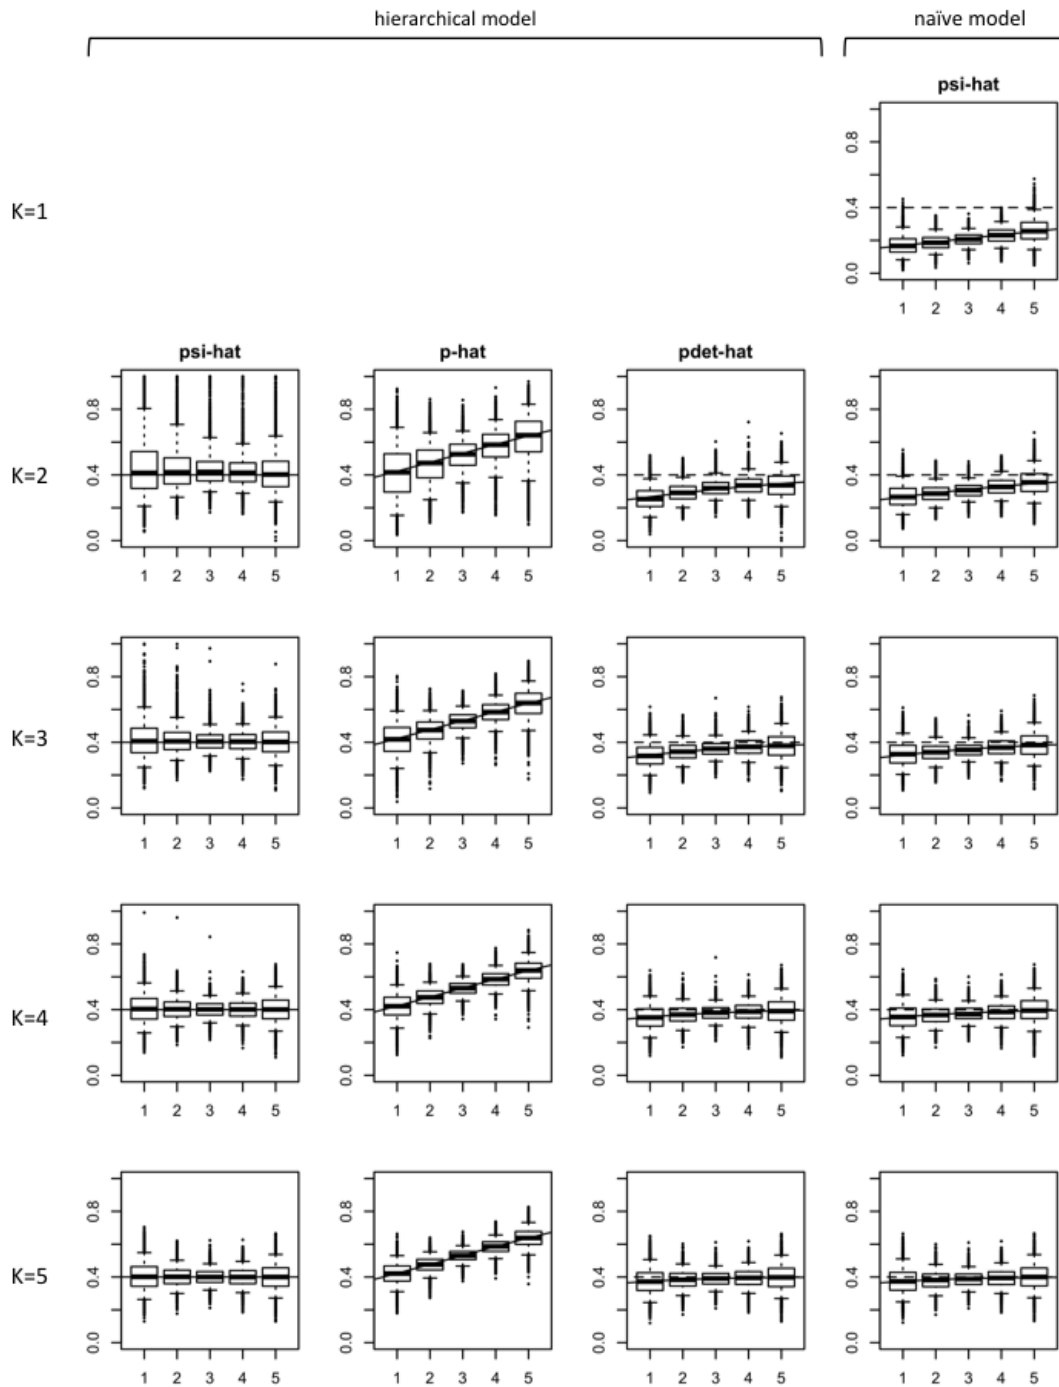

Figure S1.2: Scenario A1,  $S = 110$

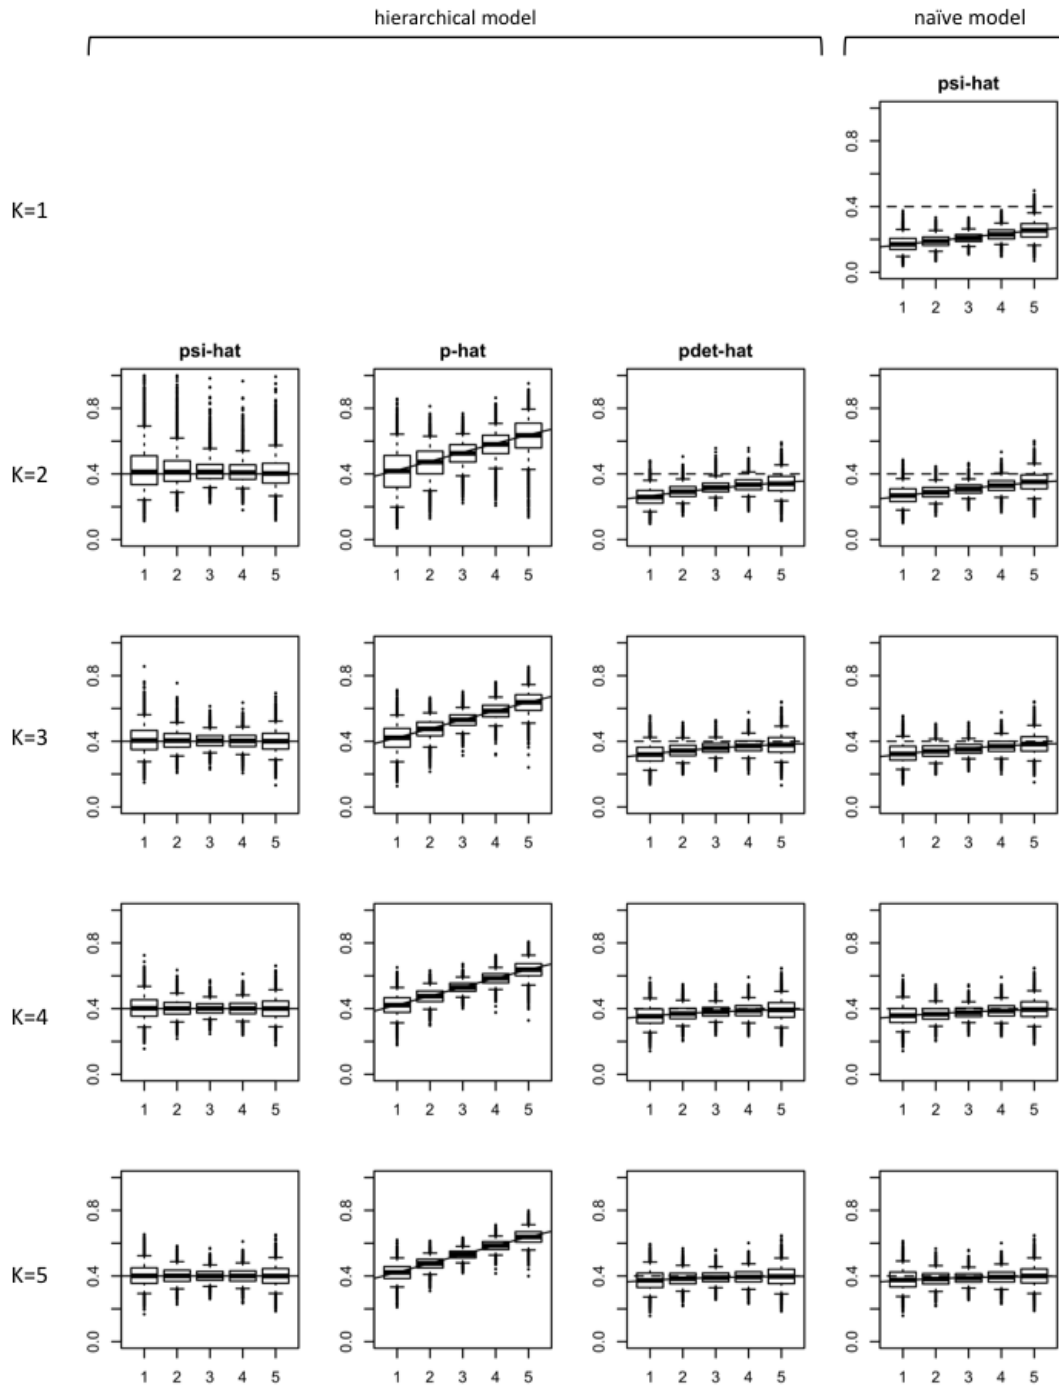

Figure S1.3: Scenario A1,  $S = 165$

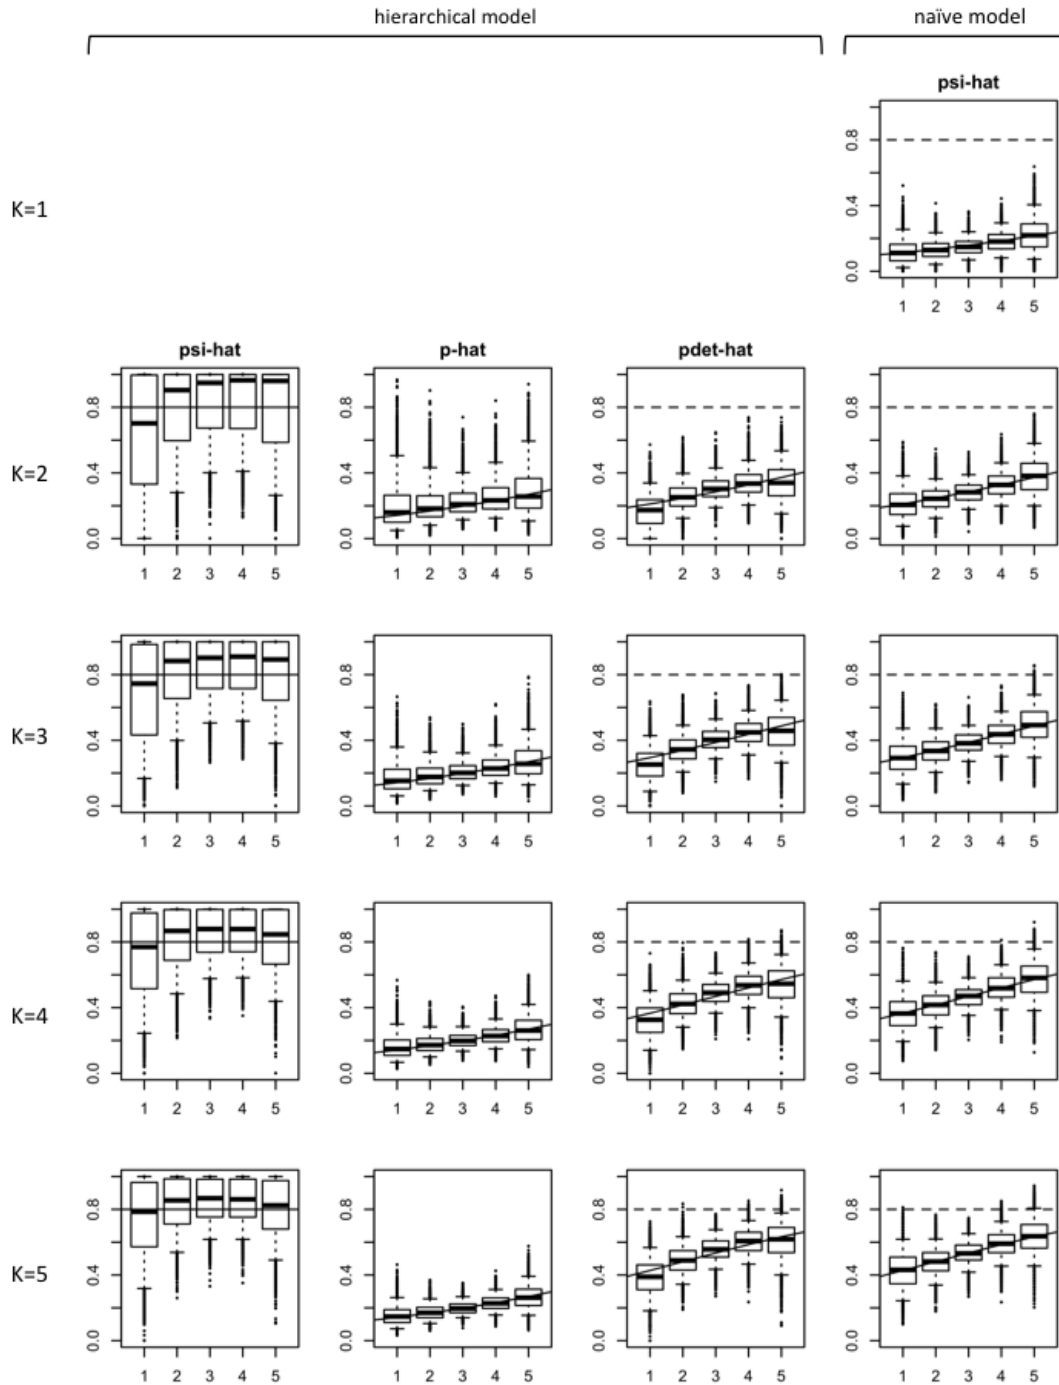

Figure S1.4: Scenario A2,  $S = 55$

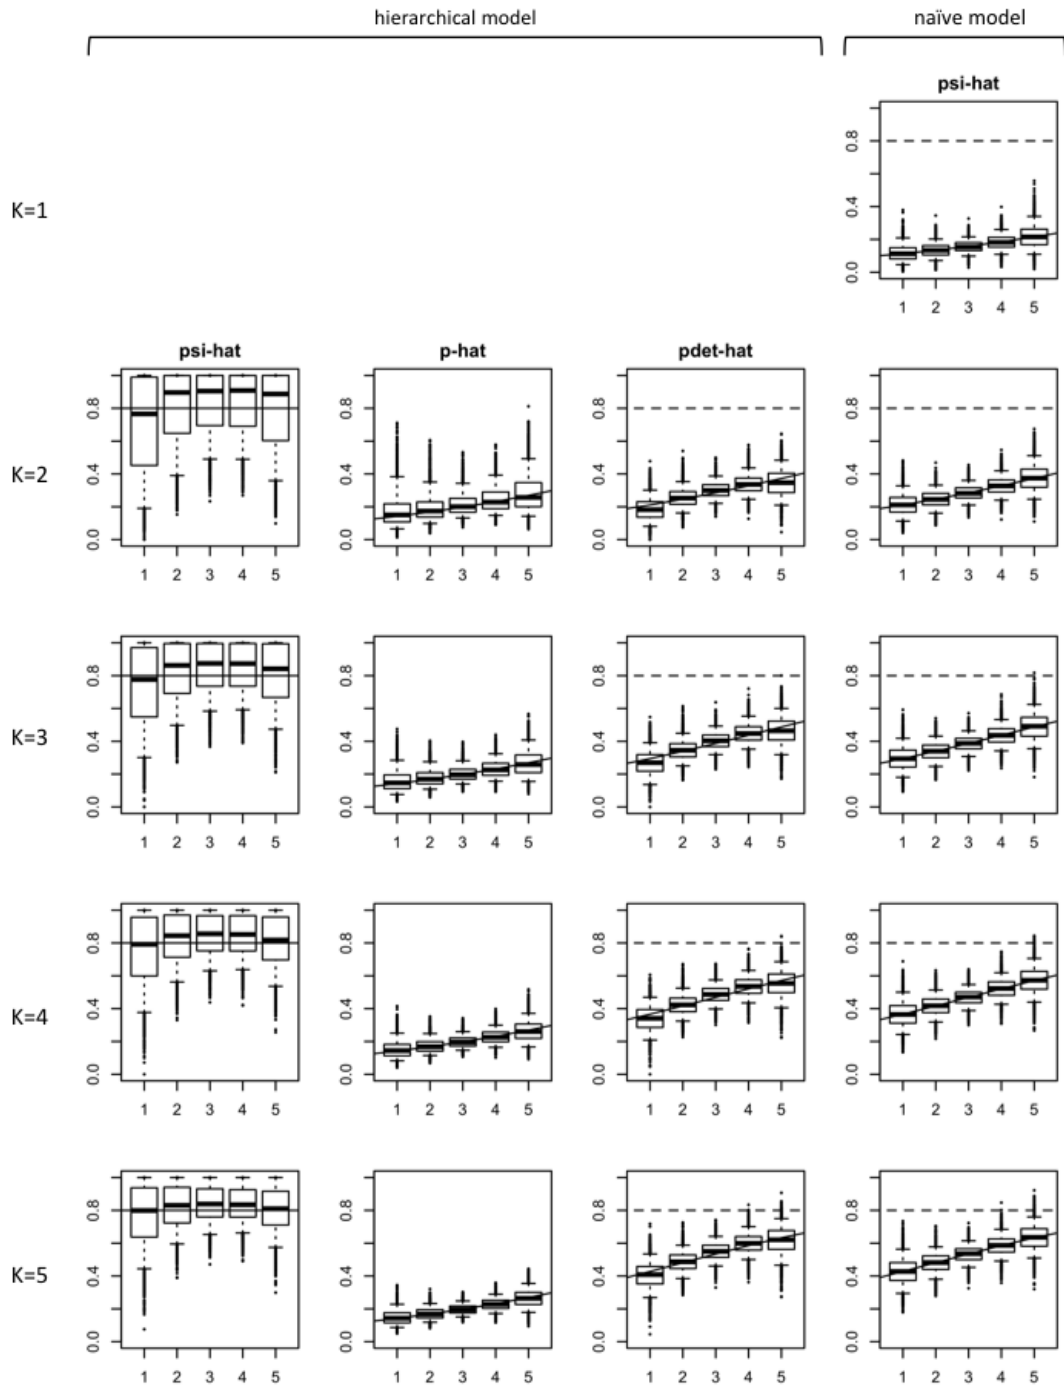

Figure S1.5: Scenario A2,  $S = 110$

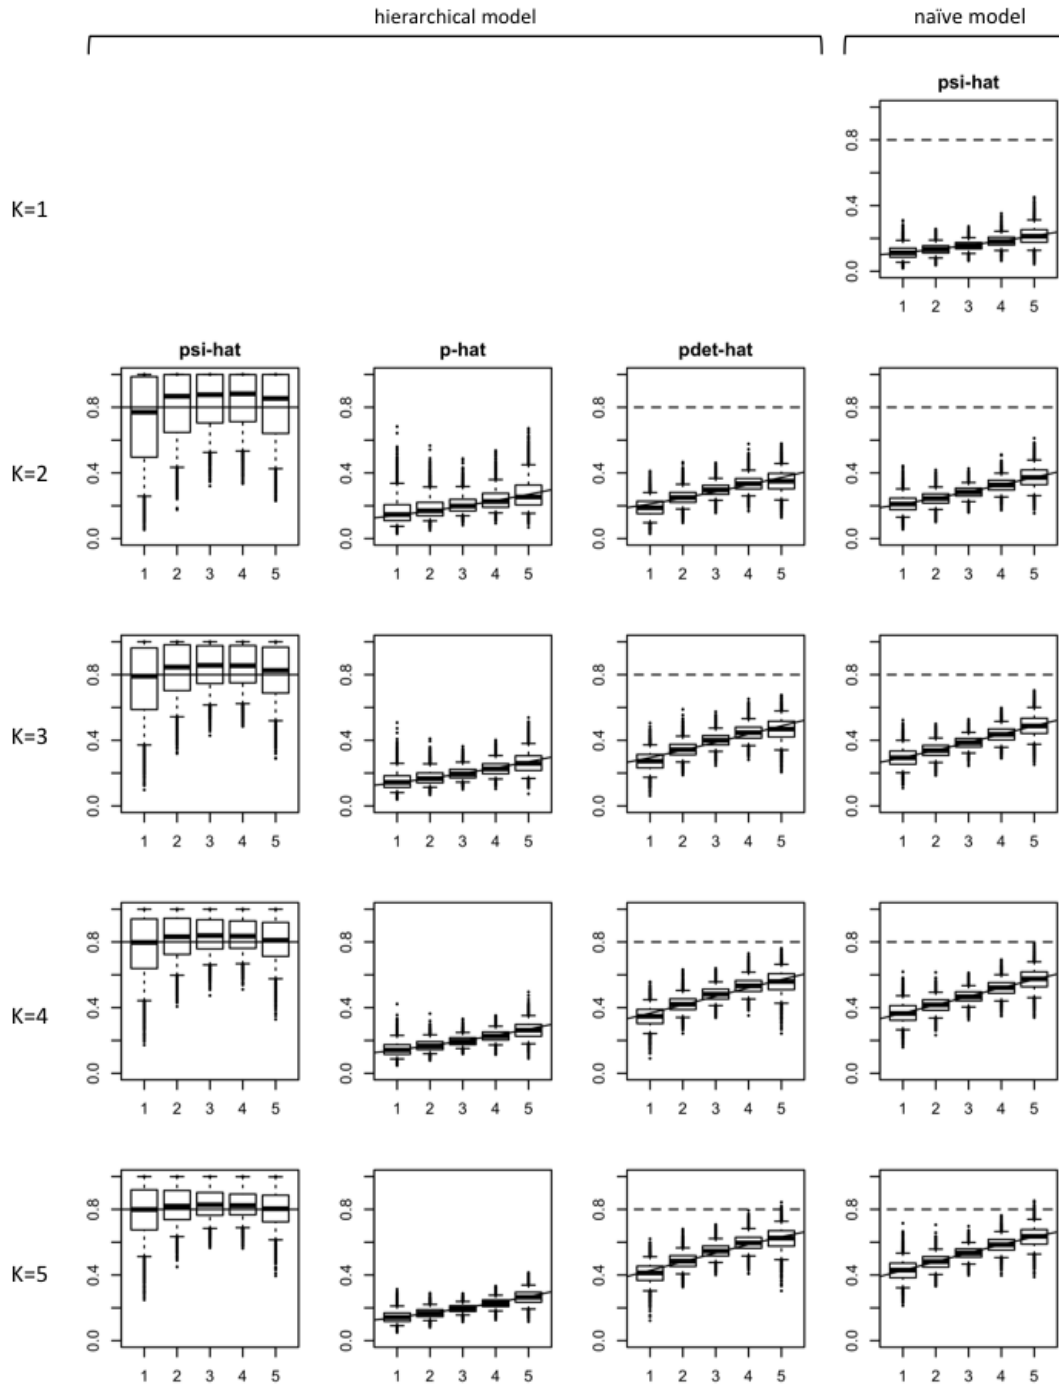

Figure S1.6: Scenario A2,  $S = 165$

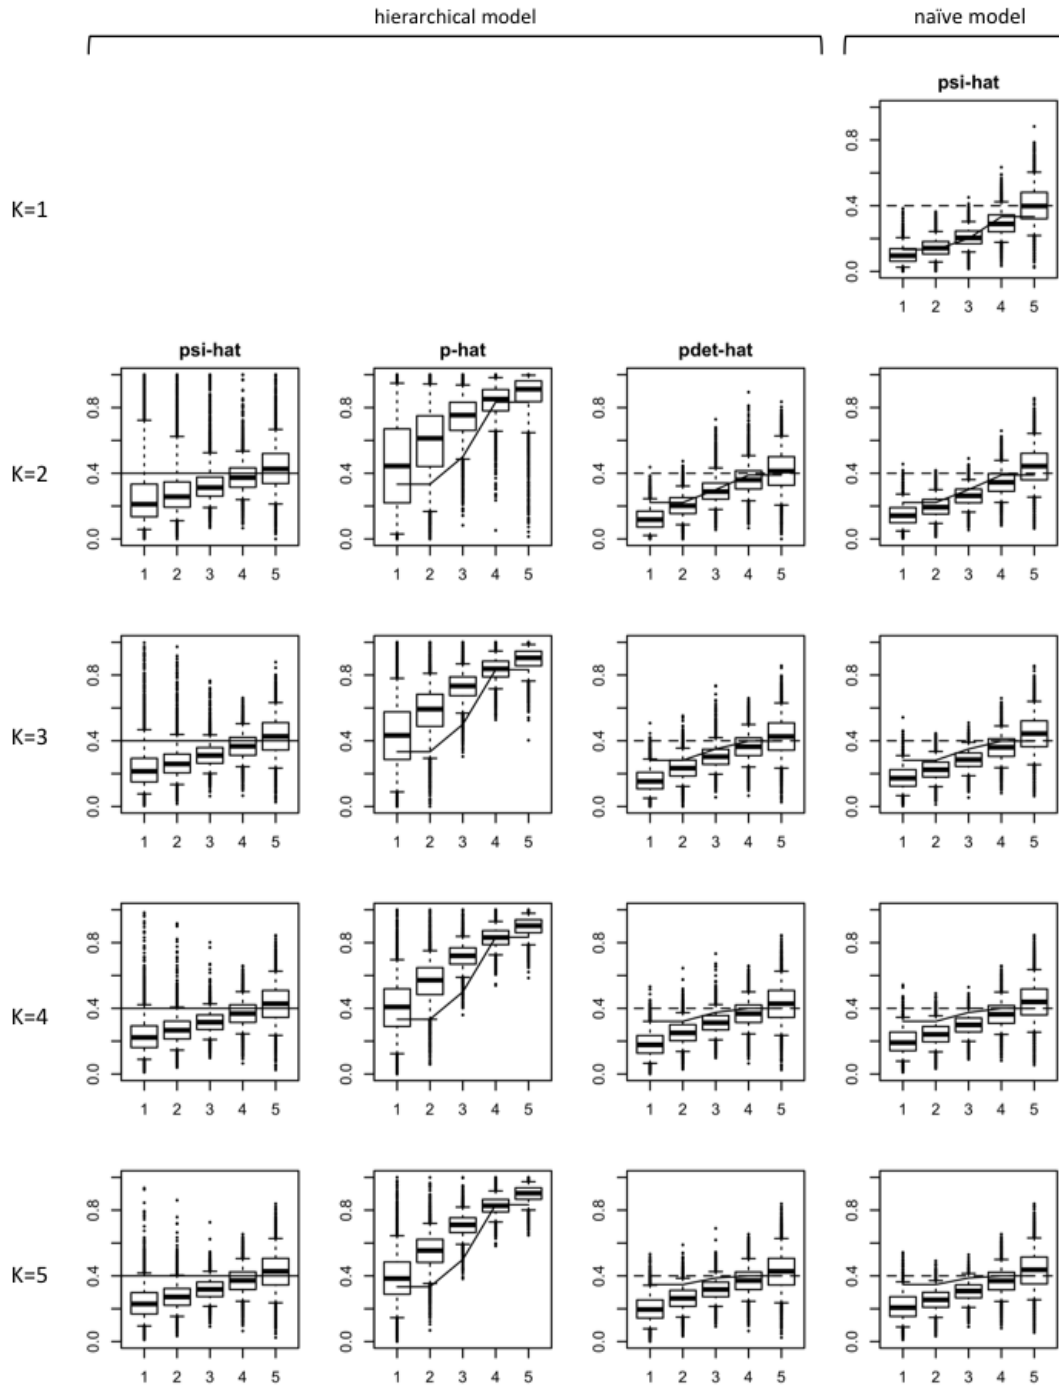

Figure S1.7: Scenario B1,  $S = 55$



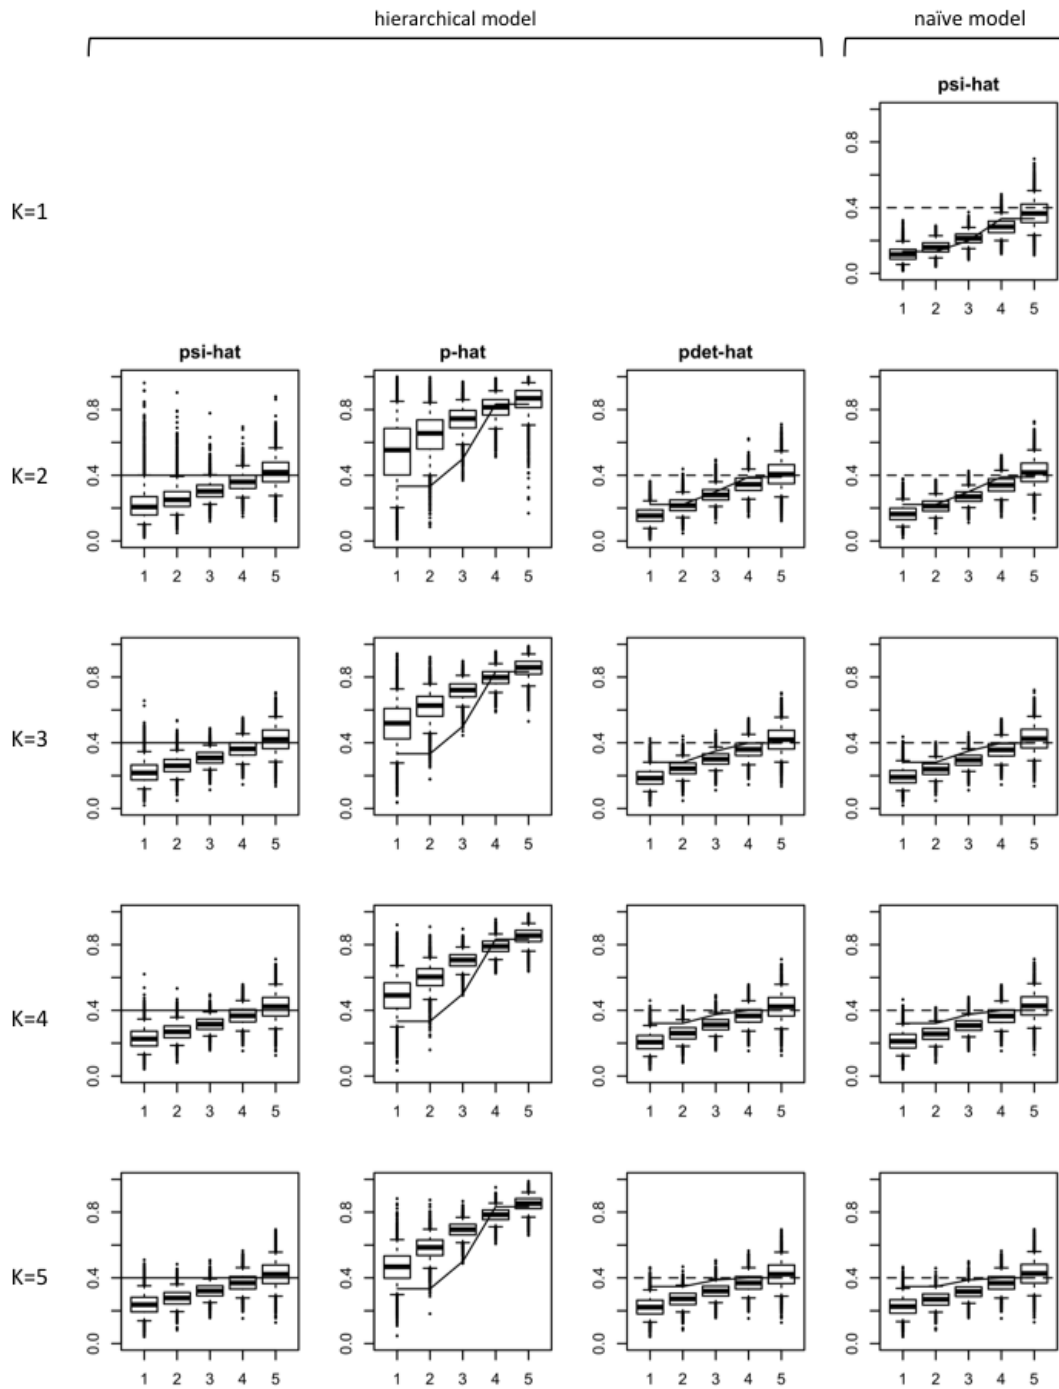

Figure S1.8: Scenario B1,  $S = 110$

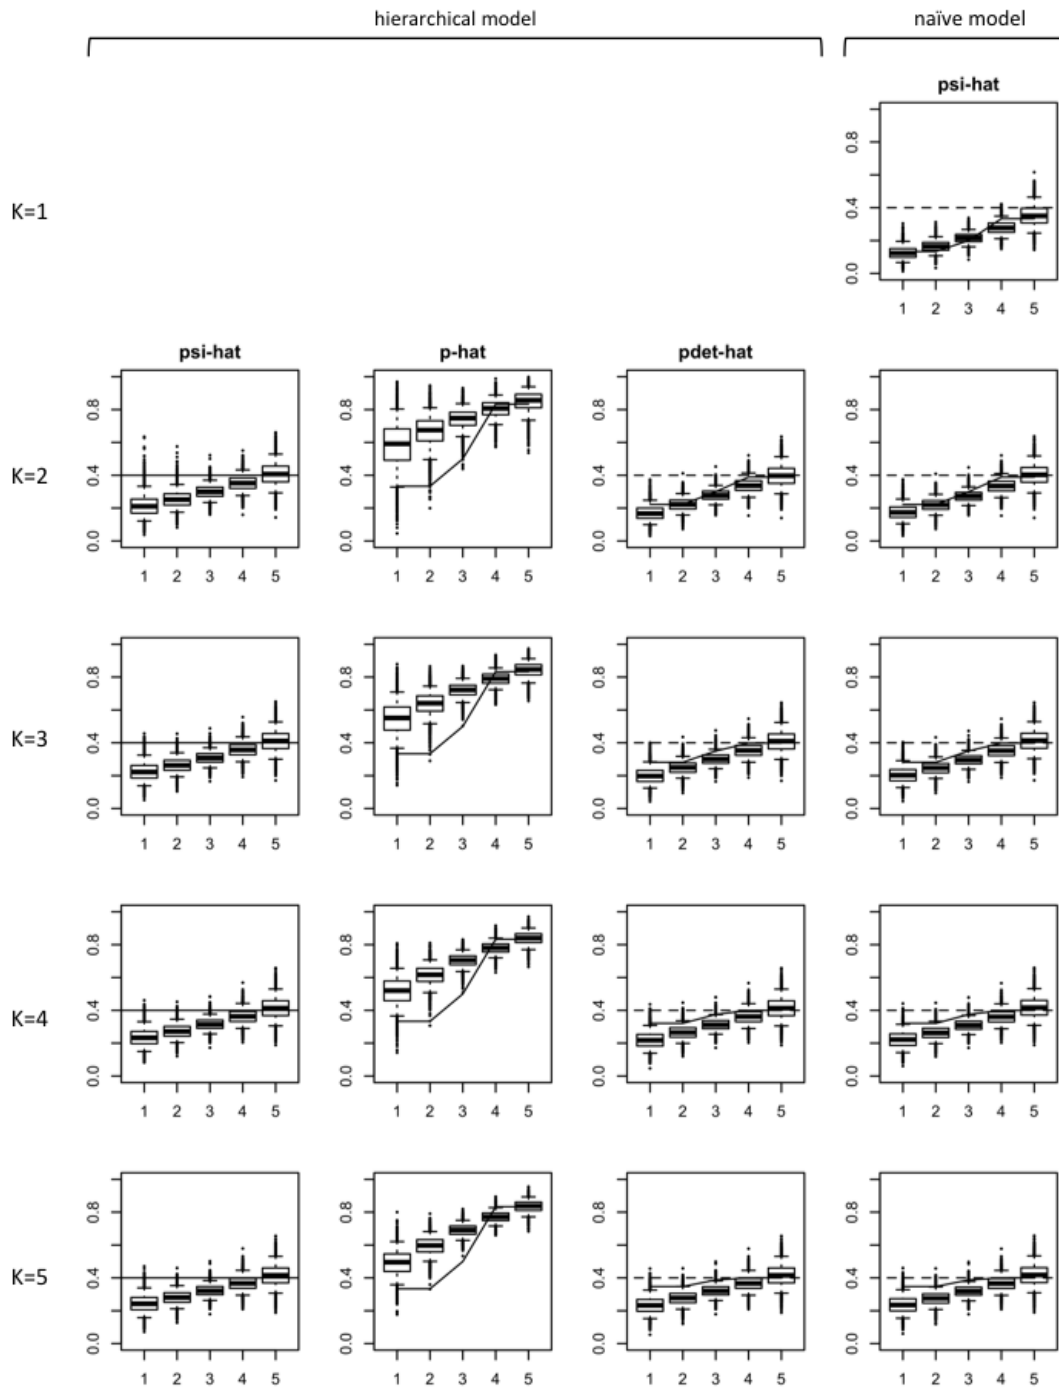

Figure S1.9: Scenario B1,  $S = 165$

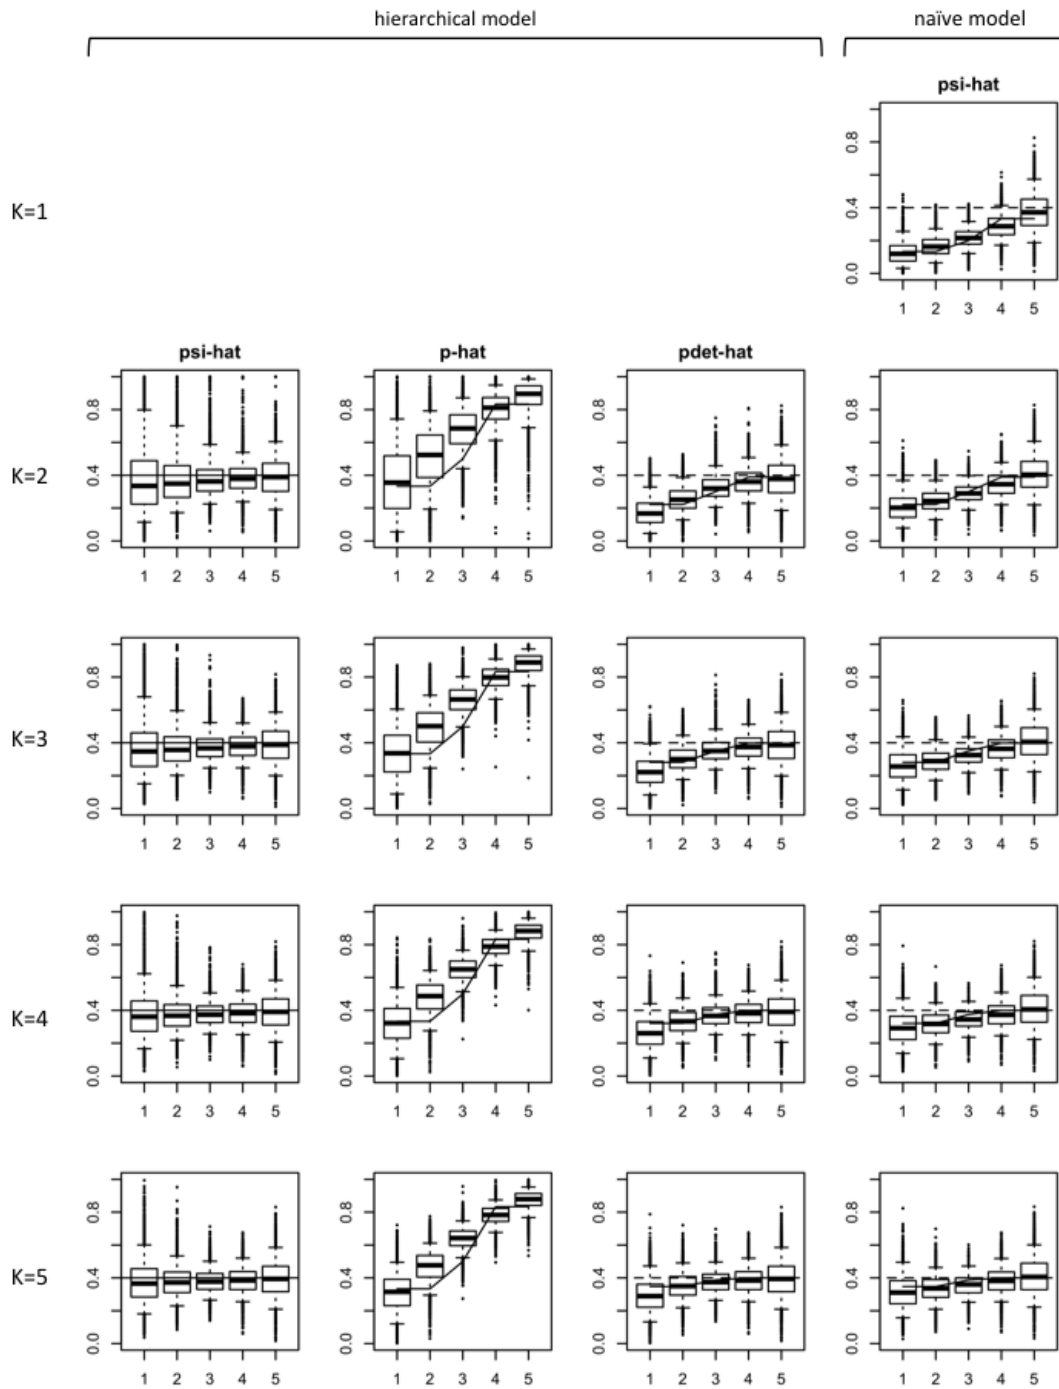

Figure S1.10: Scenario B2,  $S = 55$

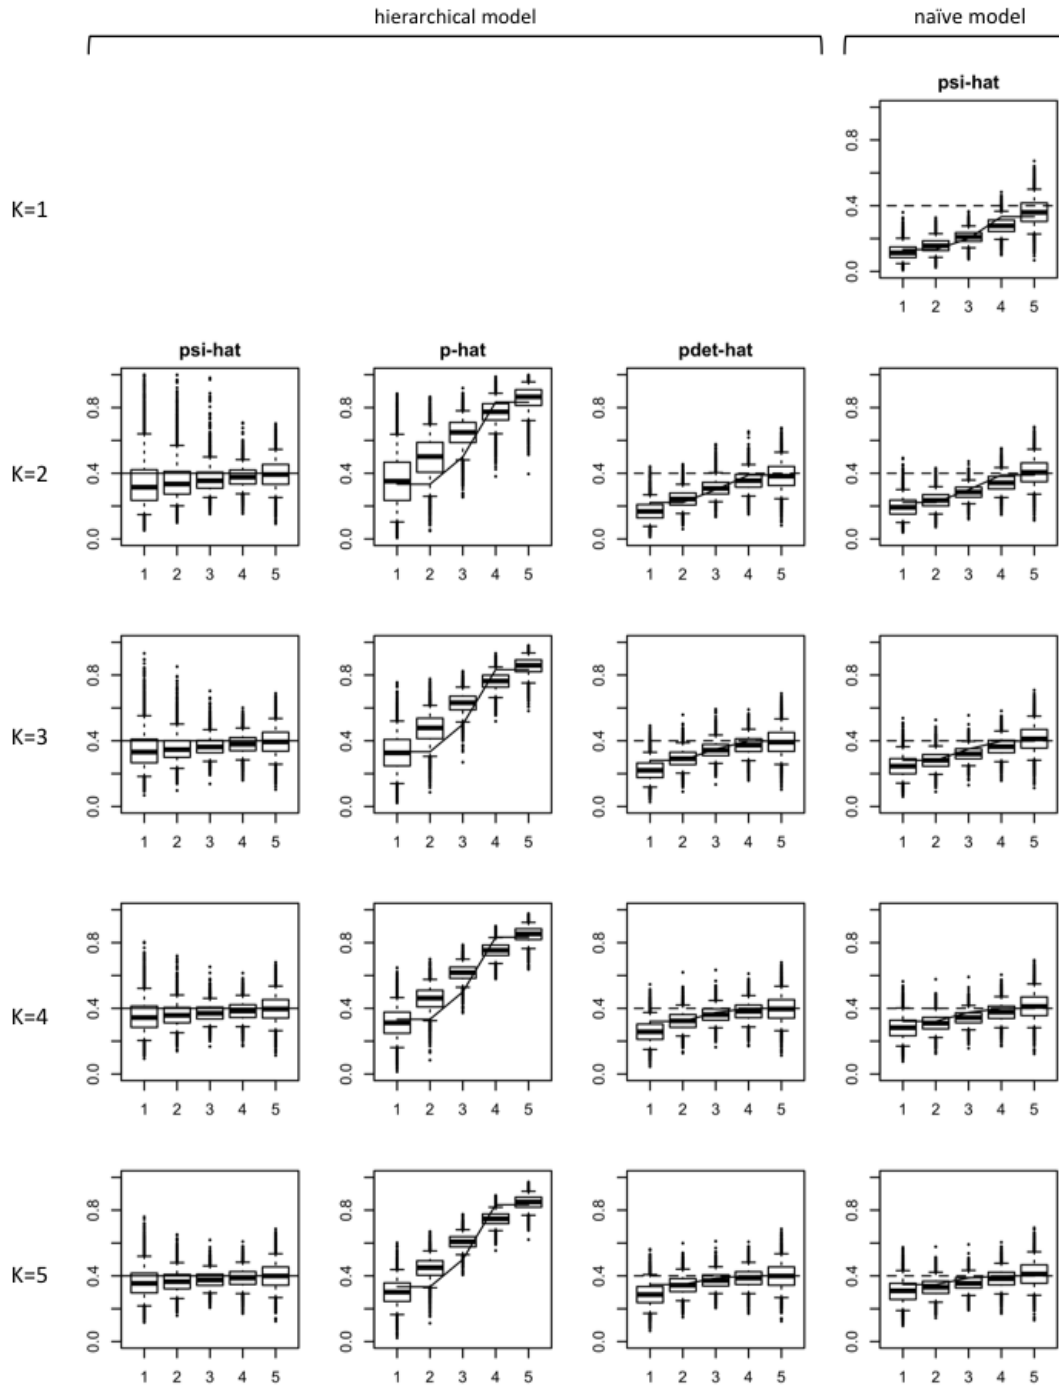

Figure S1.11: Scenario B2,  $S = 110$

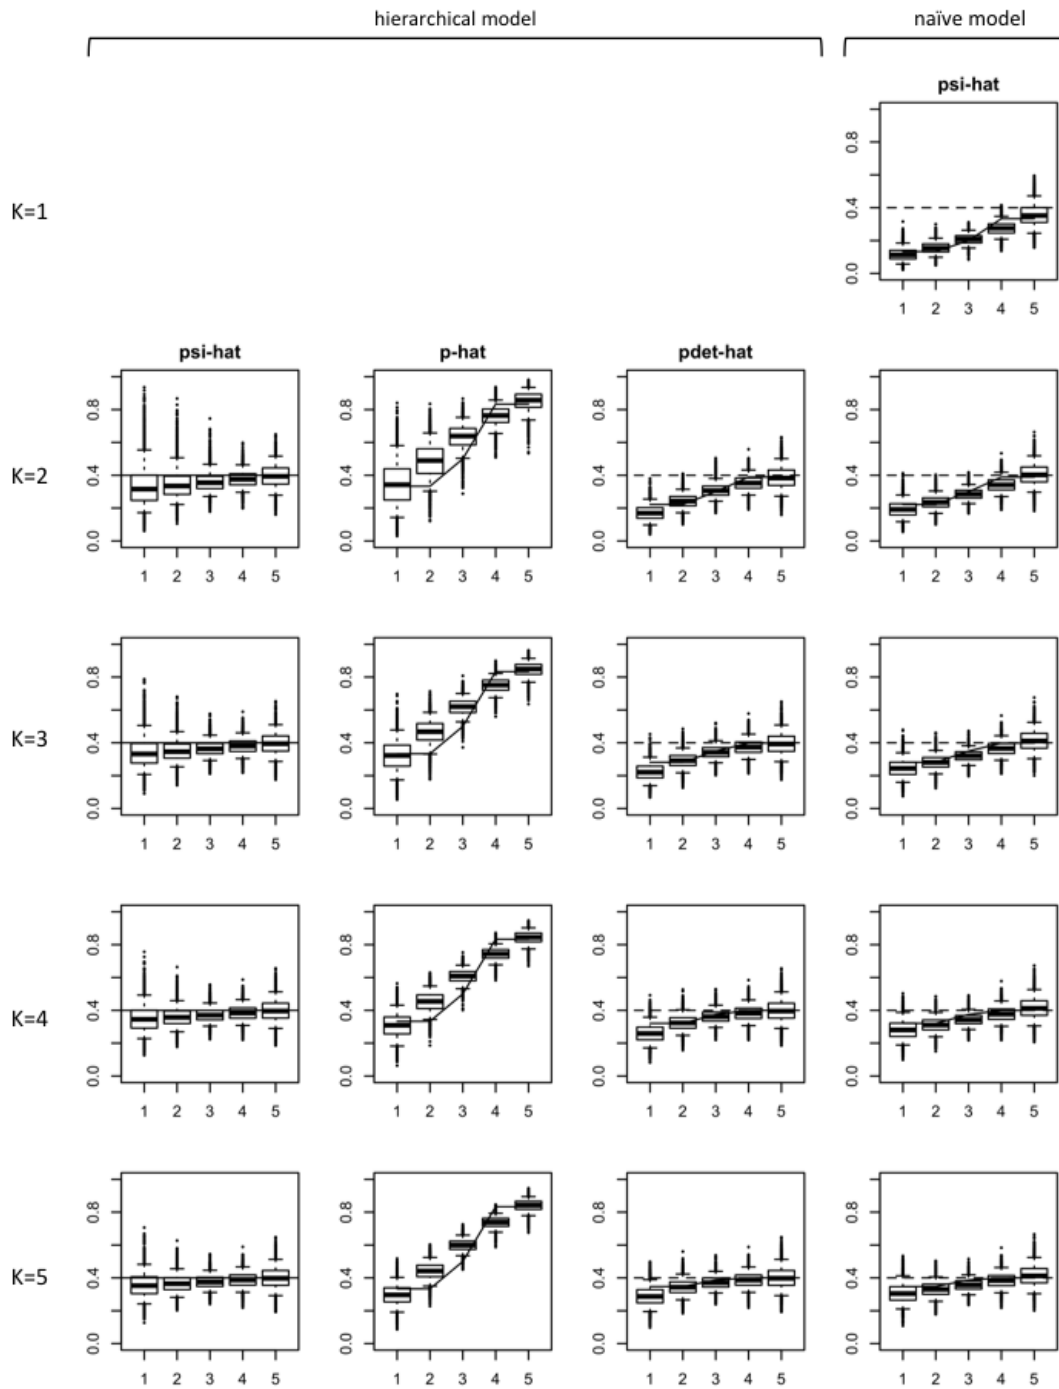

Figure S1.12: Scenario B2,  $S = 165$

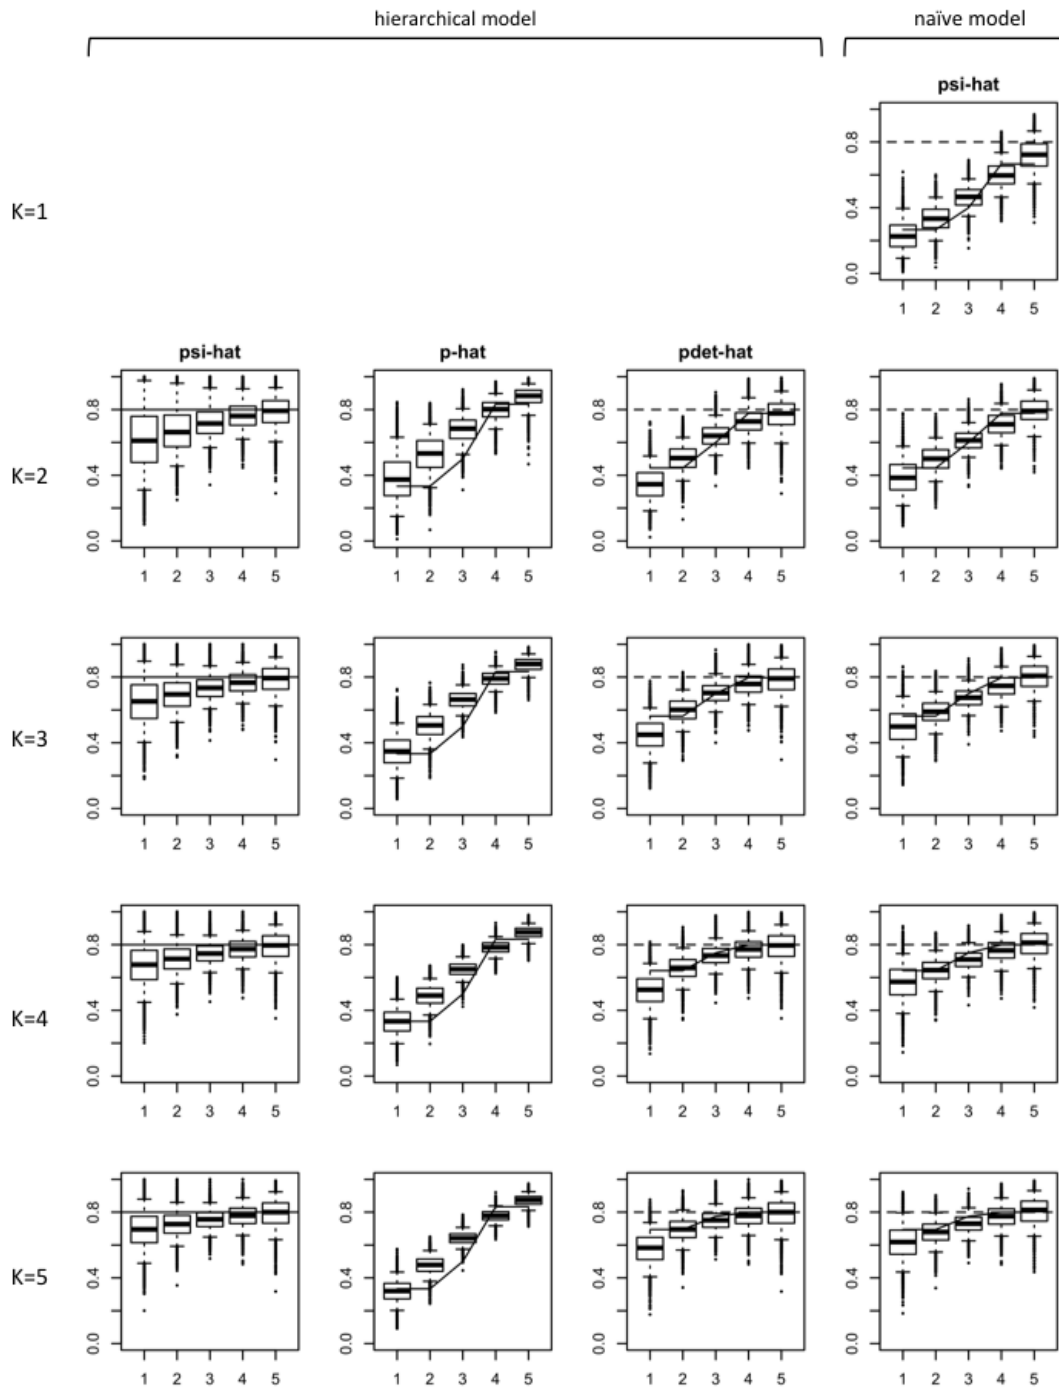

Figure S1.13: Scenario B3,  $S = 55$

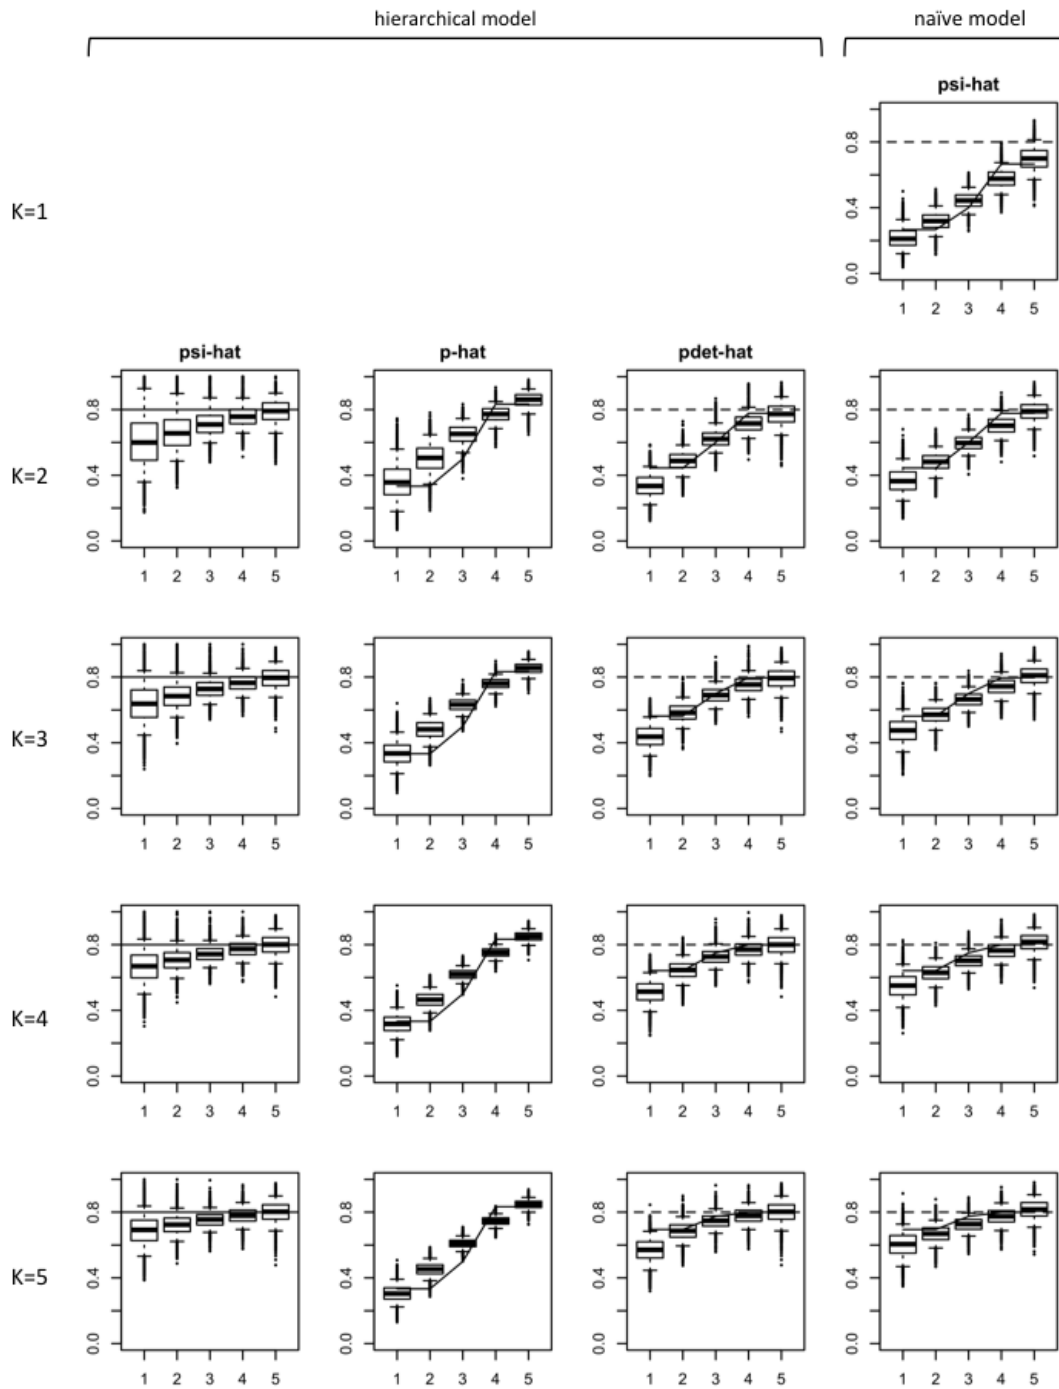

Figure S1.14: Scenario B3,  $S = 110$

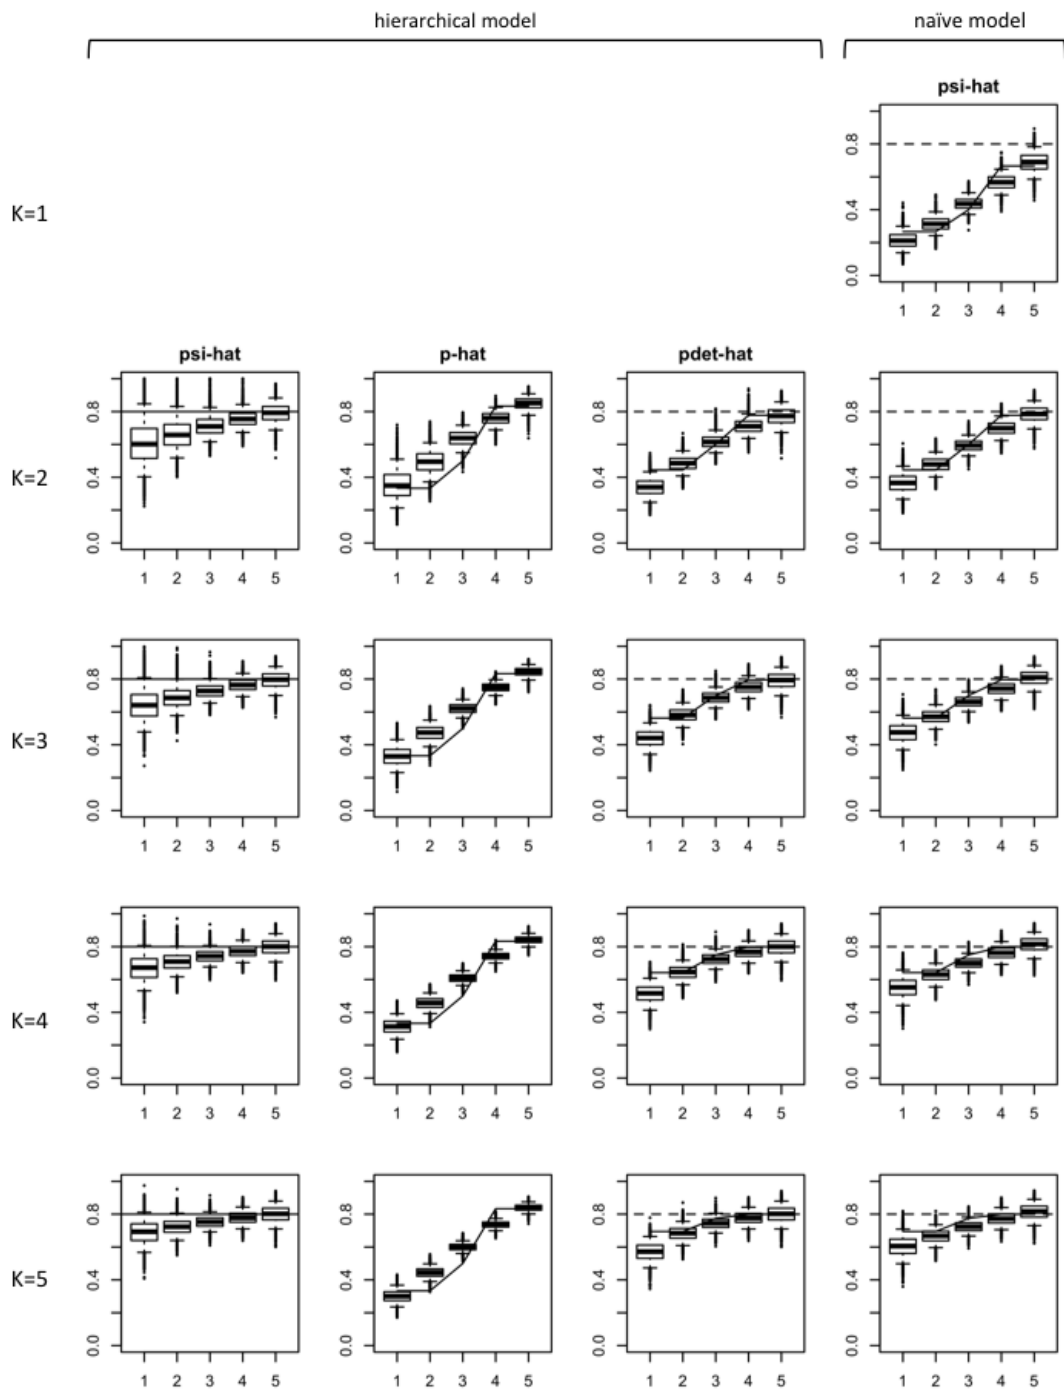

Figure S1.15: Scenario B3,  $S = 165$
